# Supplementary material for: Identification of rare germline copy number variations over-represented in five human cancer types
Source: PubMed Central journal article supplement (PMC4381456; doi:10.1186/s12943-015-0292-6), 2015-02-03

### Breast cancers (BRCA), Chr11:51185363

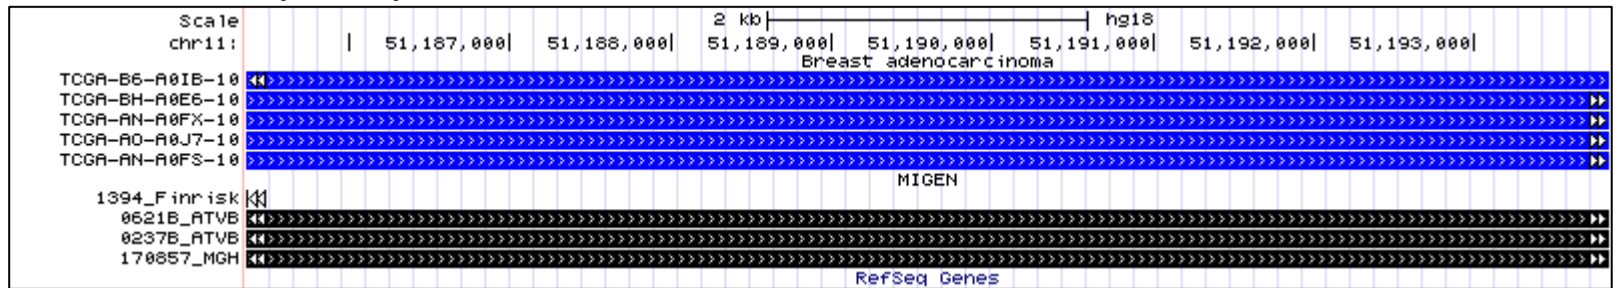

### Breast cancers (BRCA), Chr3:62936471

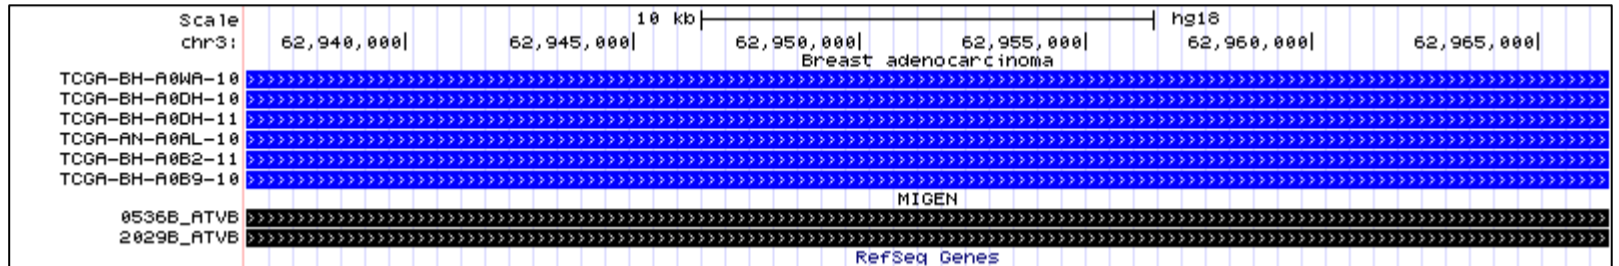

### Breast cancers (BRCA), Chr3:26586501

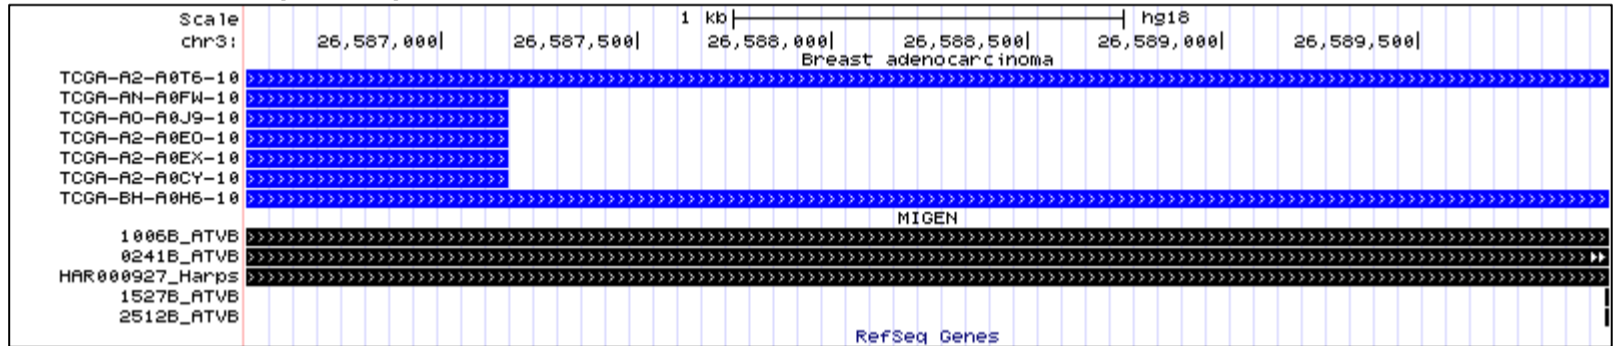

### Colorectal carcinoma (COAD, READ), chr3:107601890

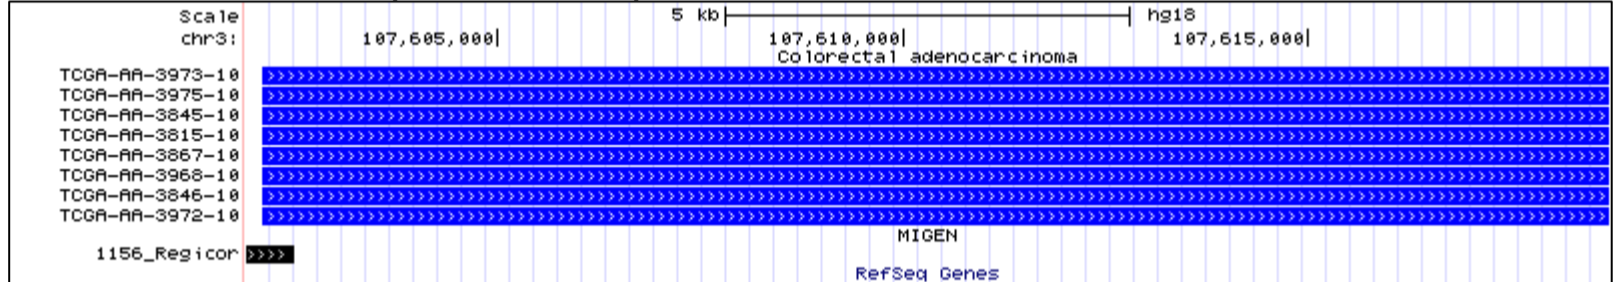

### Colorectal carcinoma (COAD, READ), Chr4:156797864

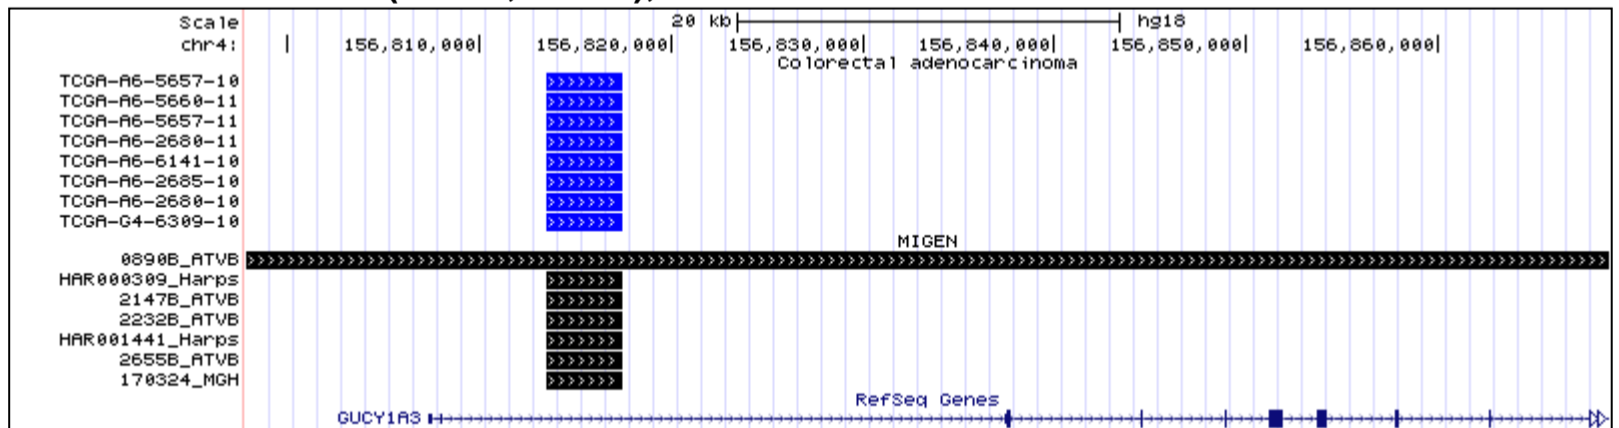

### Colorectal carcinoma (COAD, READ), Chr7:29635116

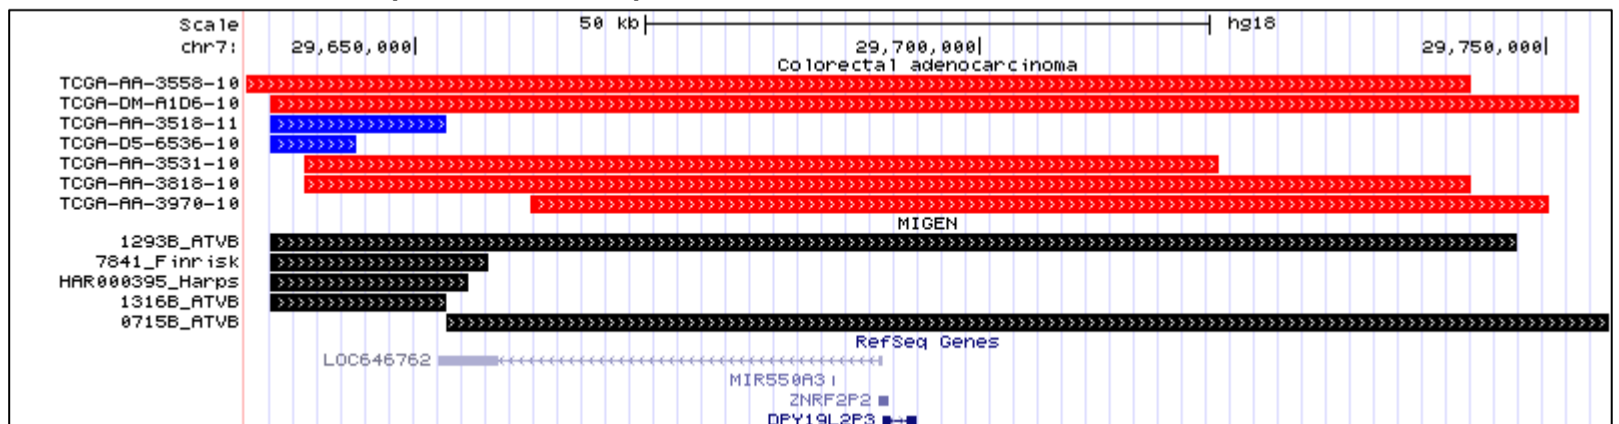

### Glioblastoma multiforme (GBM), Chr14:21685305

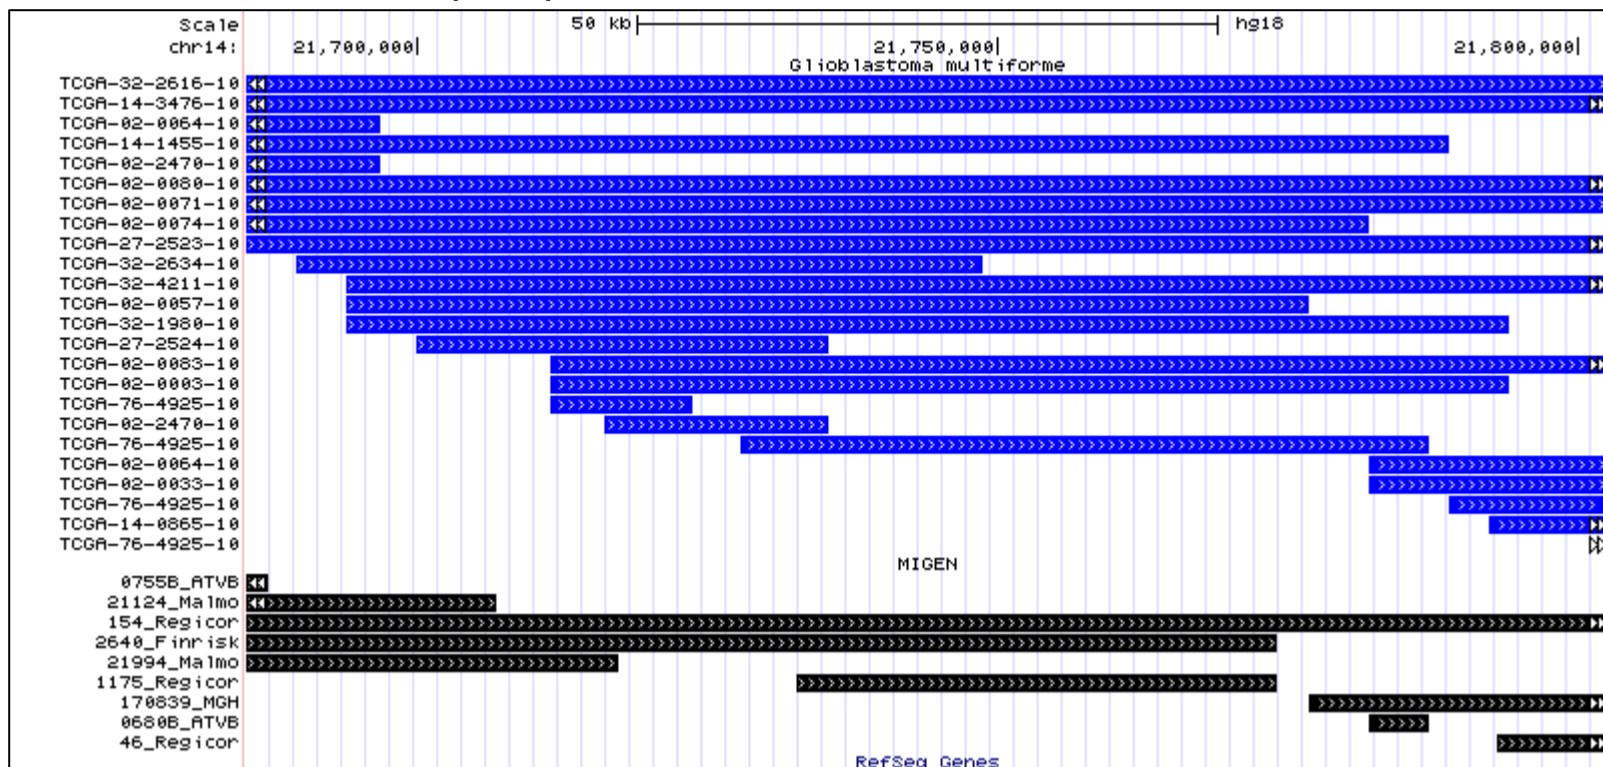

### Glioblastoma multiforme (GBM), Chr22:47288391

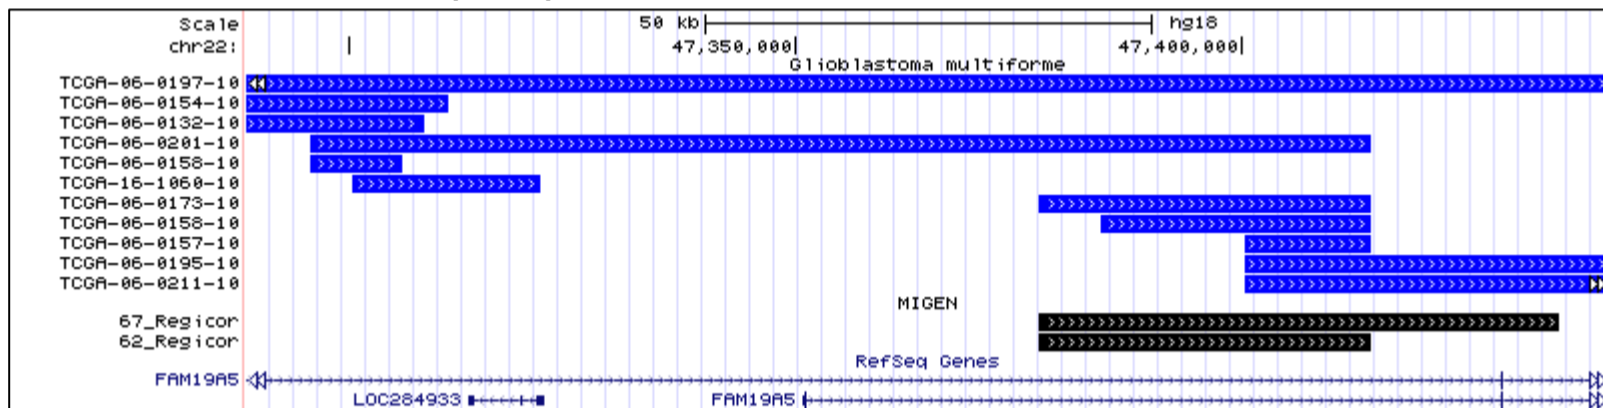

### Glioblastoma multiforme (GBM), Chr5:10927644

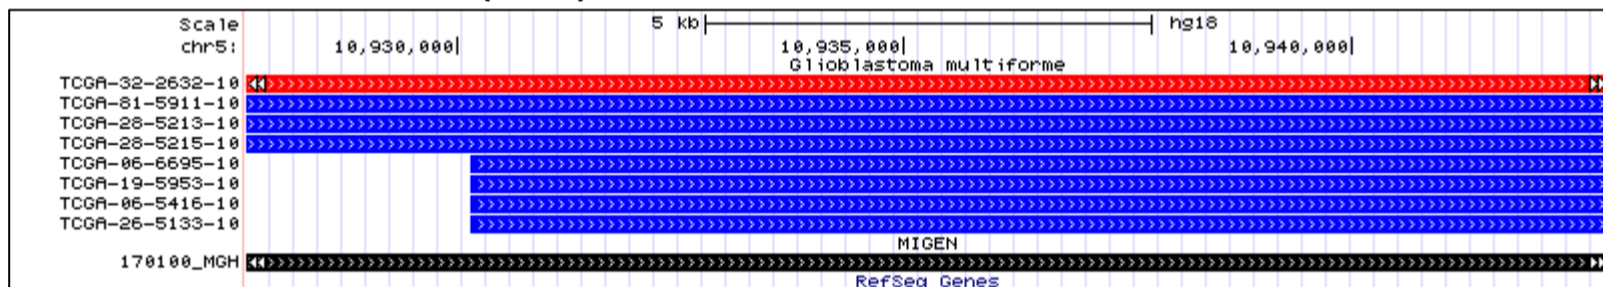

### Glioblastoma multiforme (GBM), Chr14:21804698

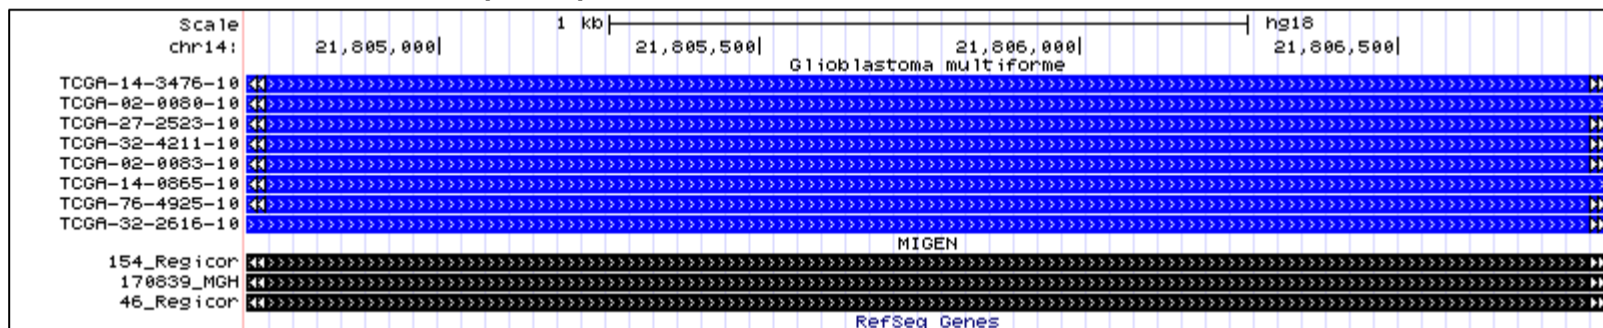

### Glioblastoma multiforme (GBM), Chr14:21681152

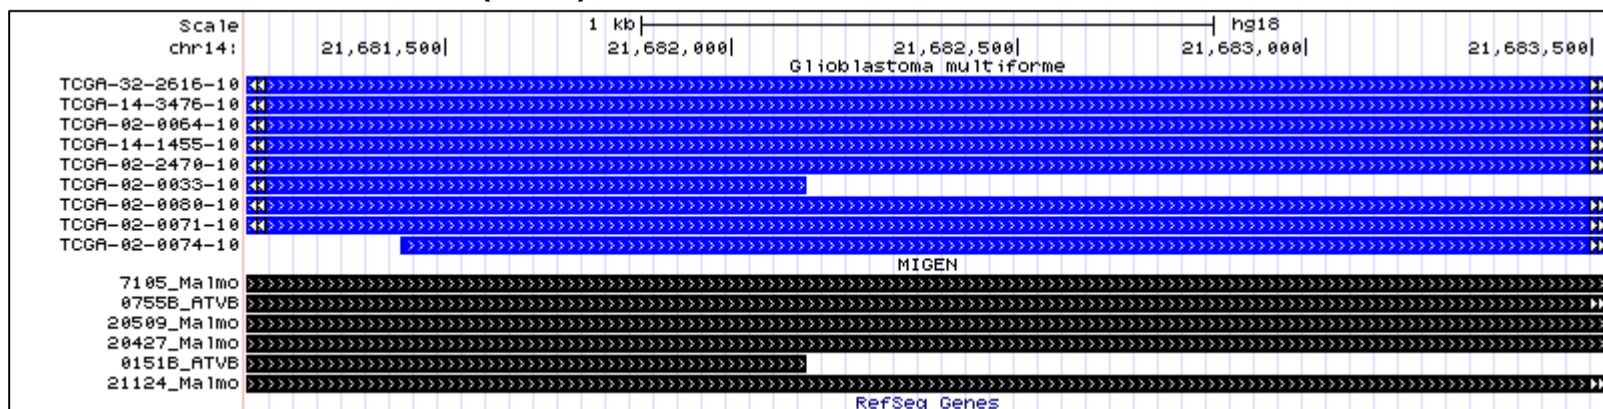

### Renal cell carcinoma (KIRK), Chr14:21681152

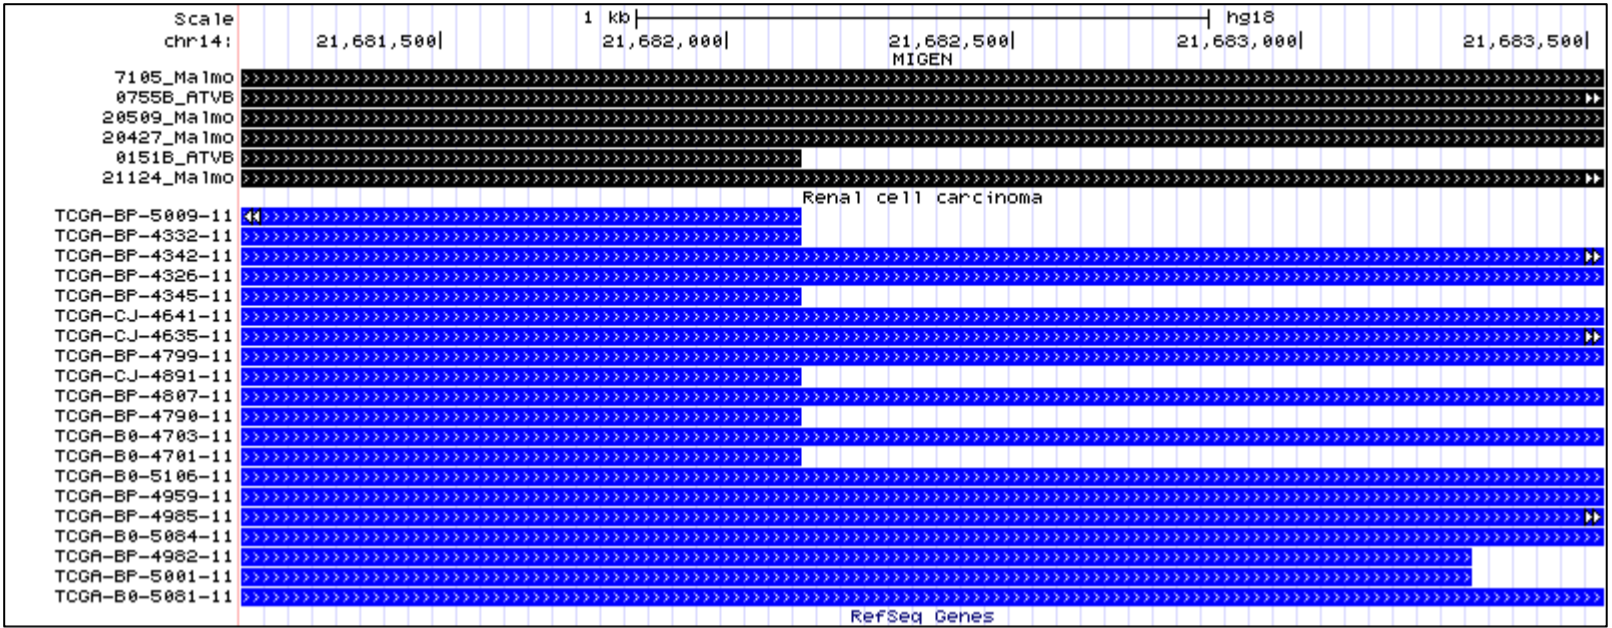

### Renal cell carcinoma (KIRK), Chr10:96855083

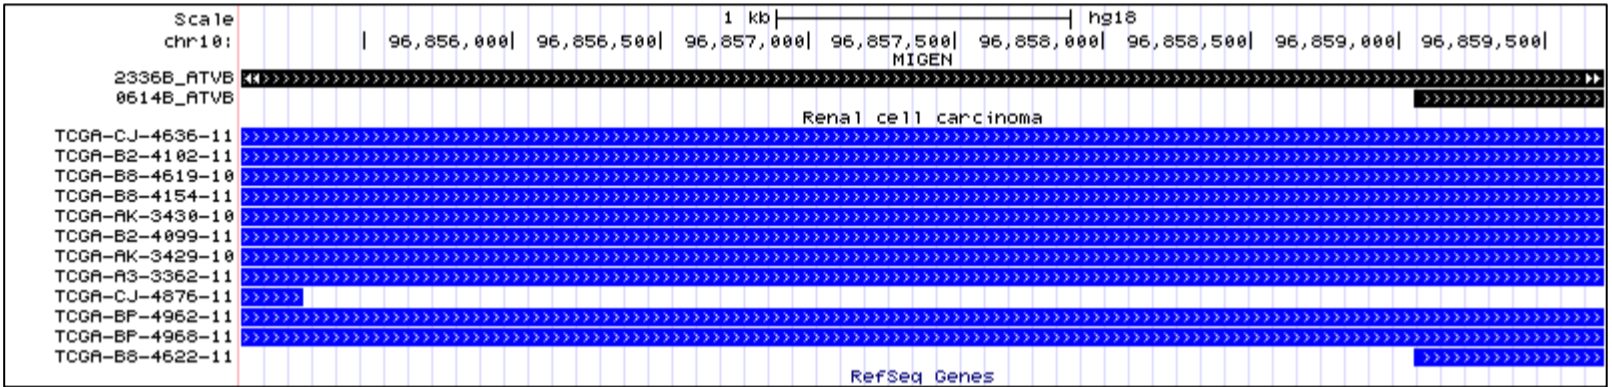

### Renal cell carcinoma (KIRK), Chr3:89250592

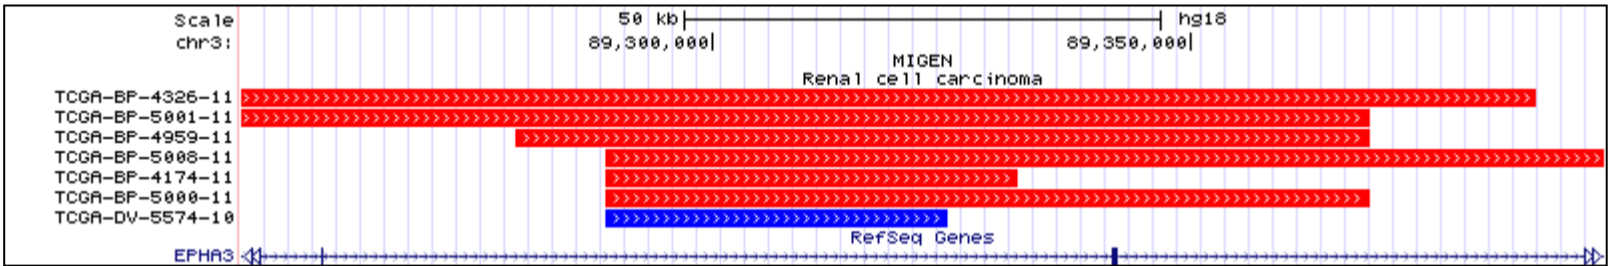

### Renal cell carcinoma (KIRK), Chr6:118470482

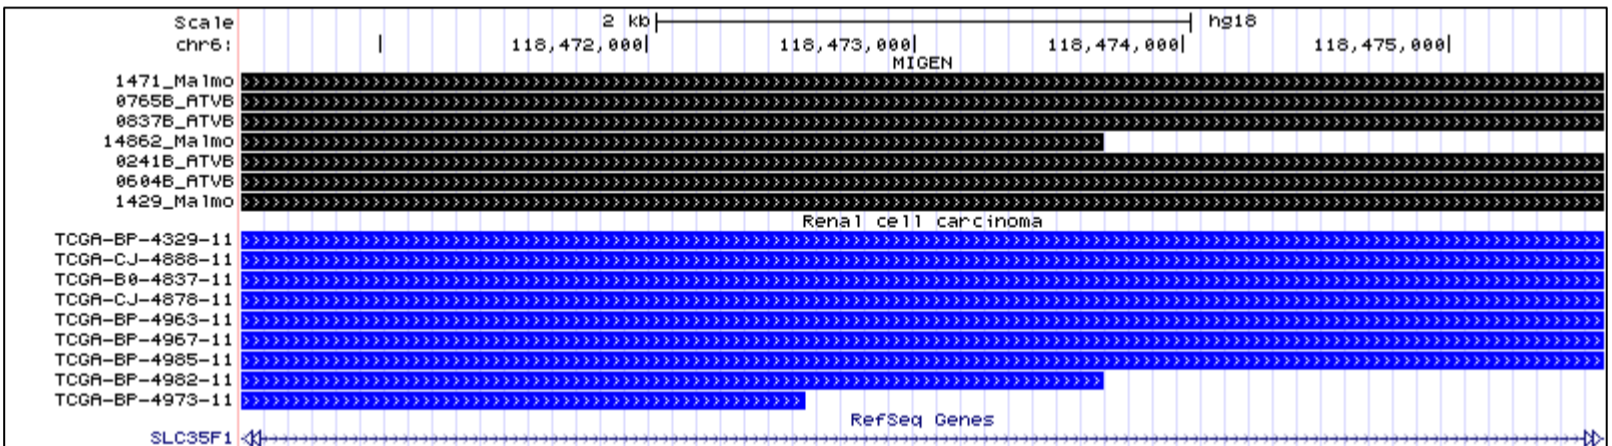

### Renal cell carcinoma (KIRK), Chr4:103363913

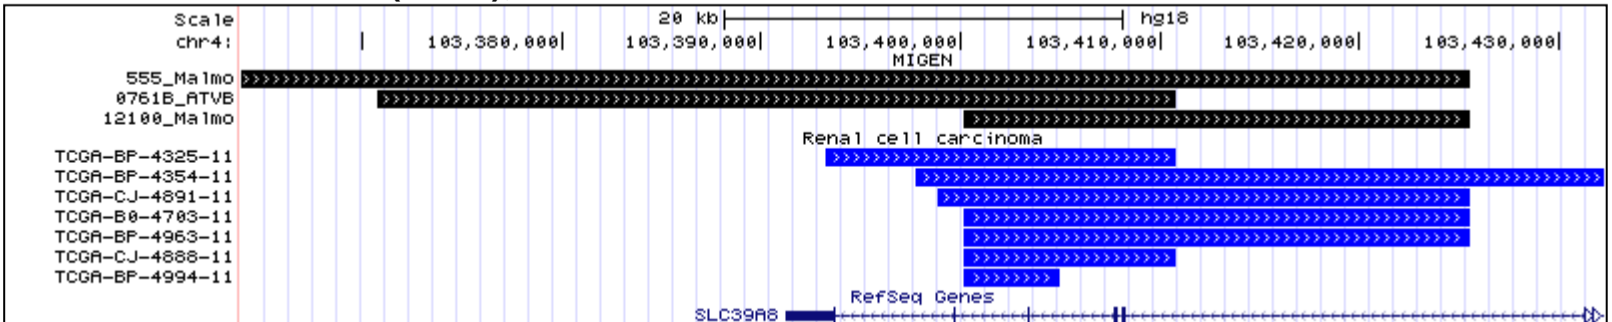

### Renal cell carcinoma (KIRK), Chr7:19542080

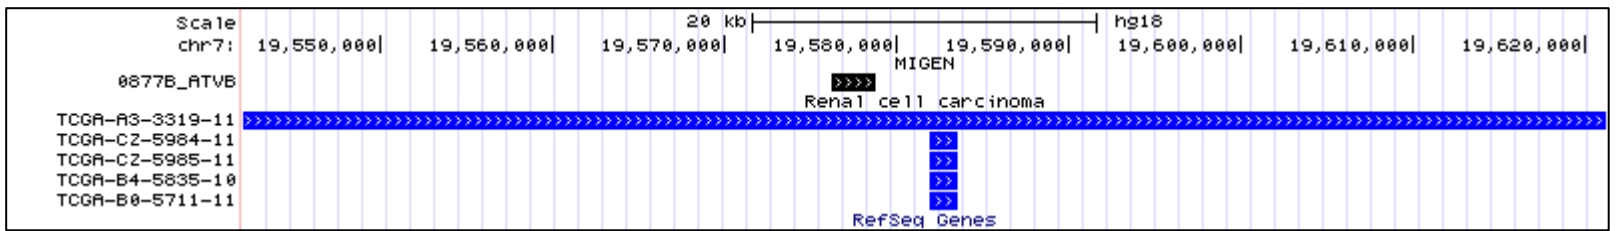

### Renal cell carcinoma (KIRK), Chr12:130123182

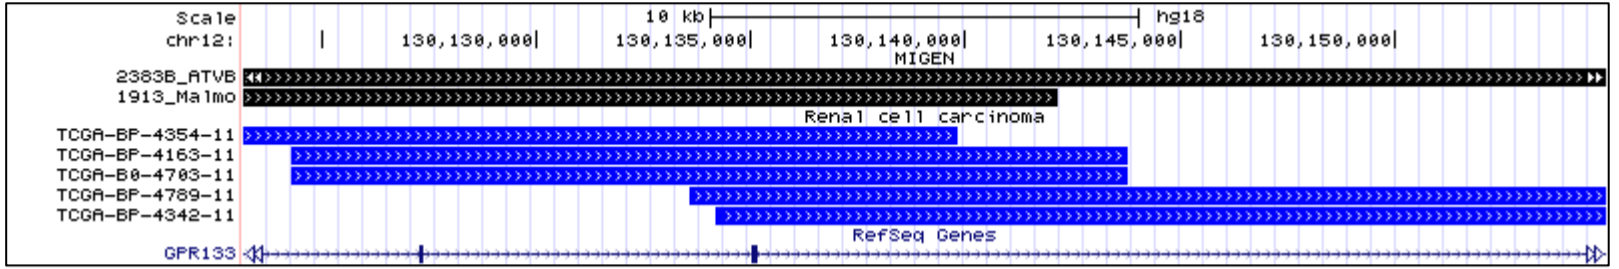

### Ovarian cancer (OV), Chr13:54589383

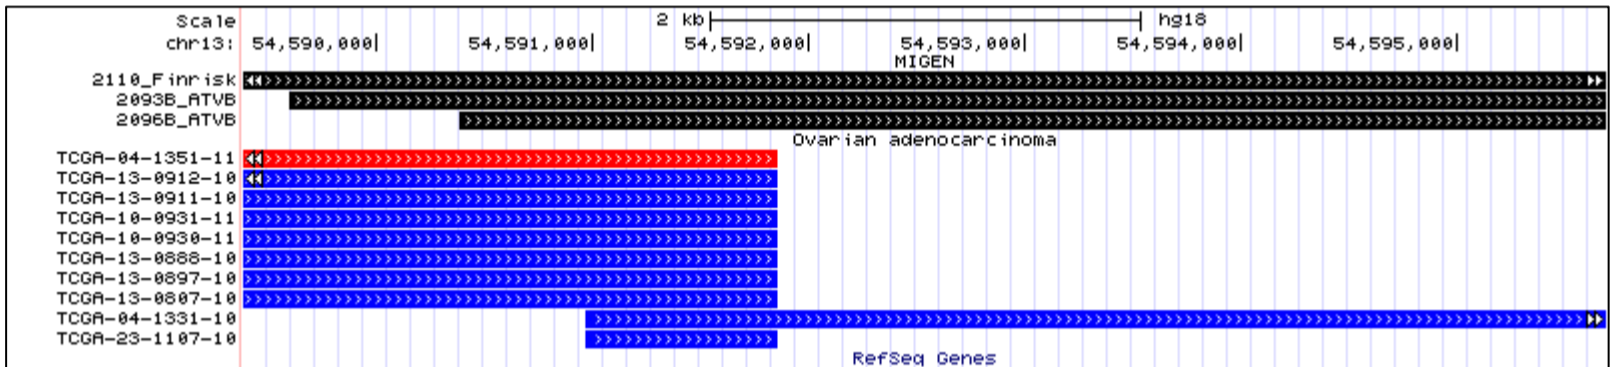

### Ovarian cancer (OV), Chr4:36584413

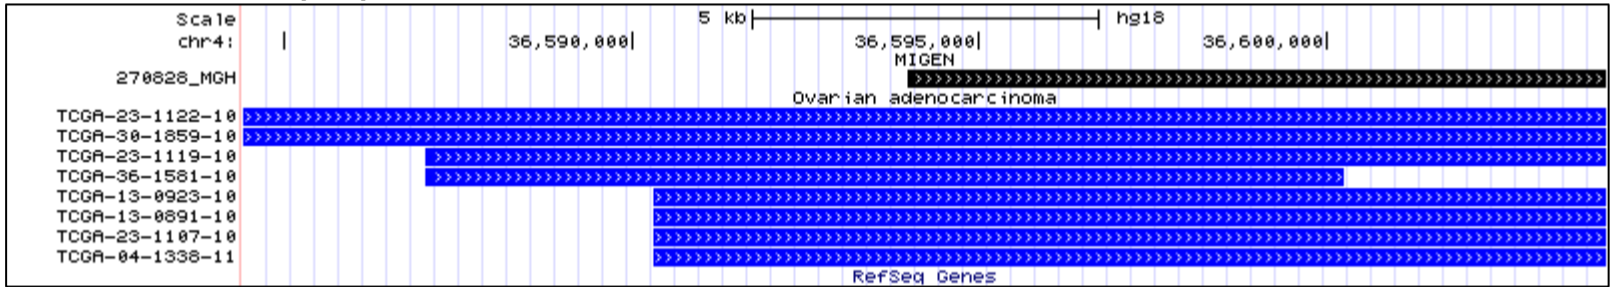

### Ovarian cancer (OV), Chr1:244904225

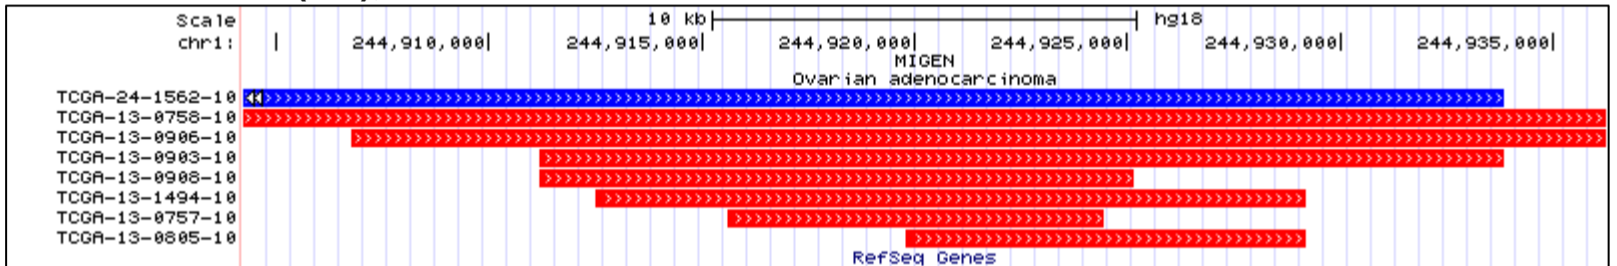

### Ovarian cancer (OV), Chr2:192993

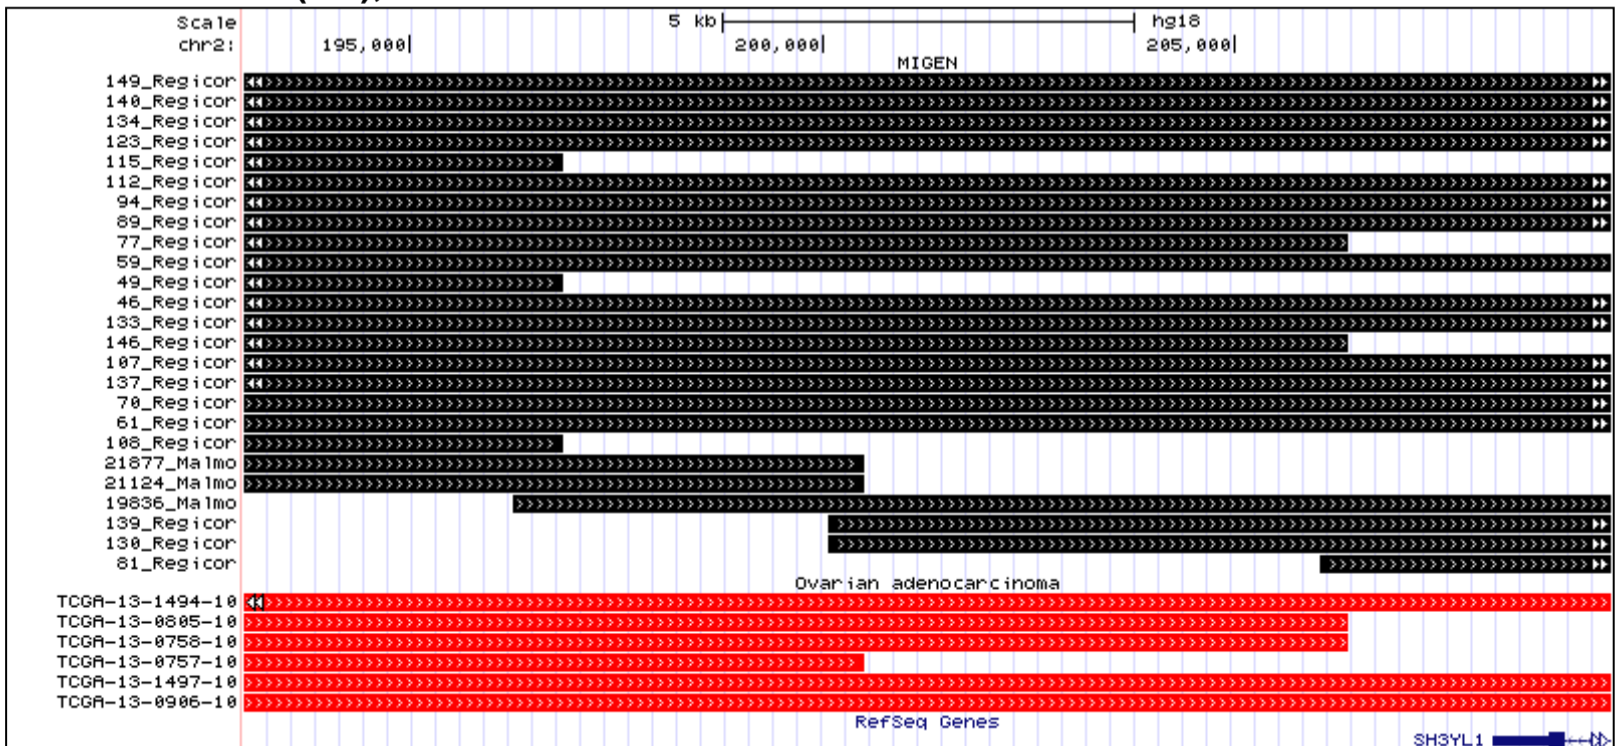

### Ovarian cancer (OV), Chr1:229982231

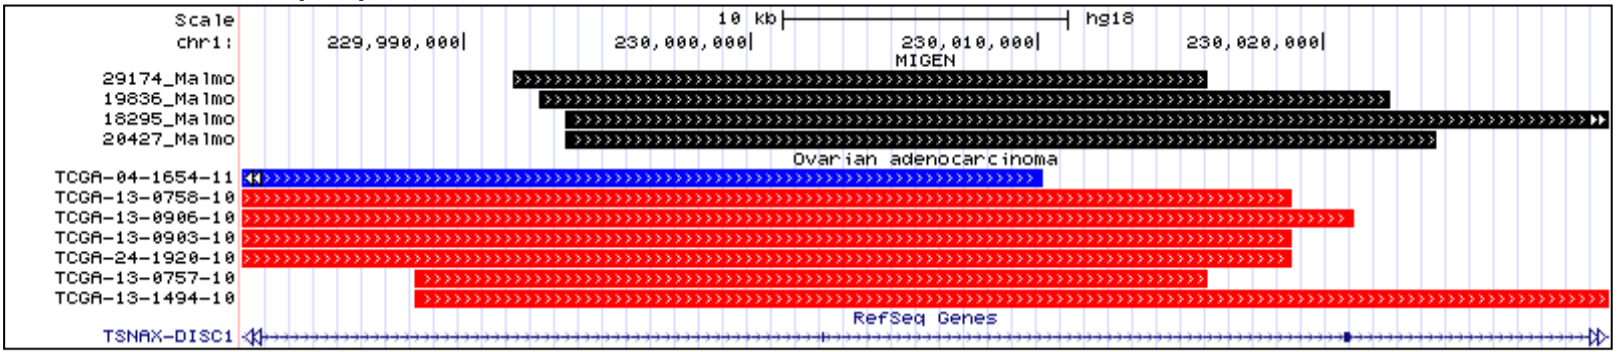

### Ovarian cancer (OV), Chr2:7529134

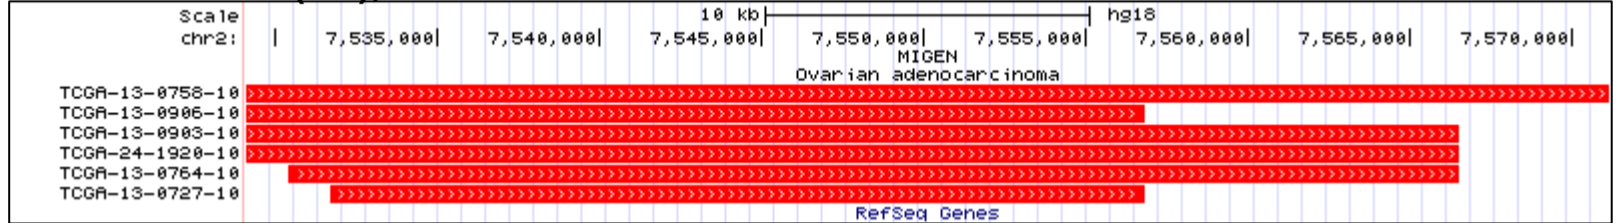

### Ovarian cancer (OV), Chr10:495985

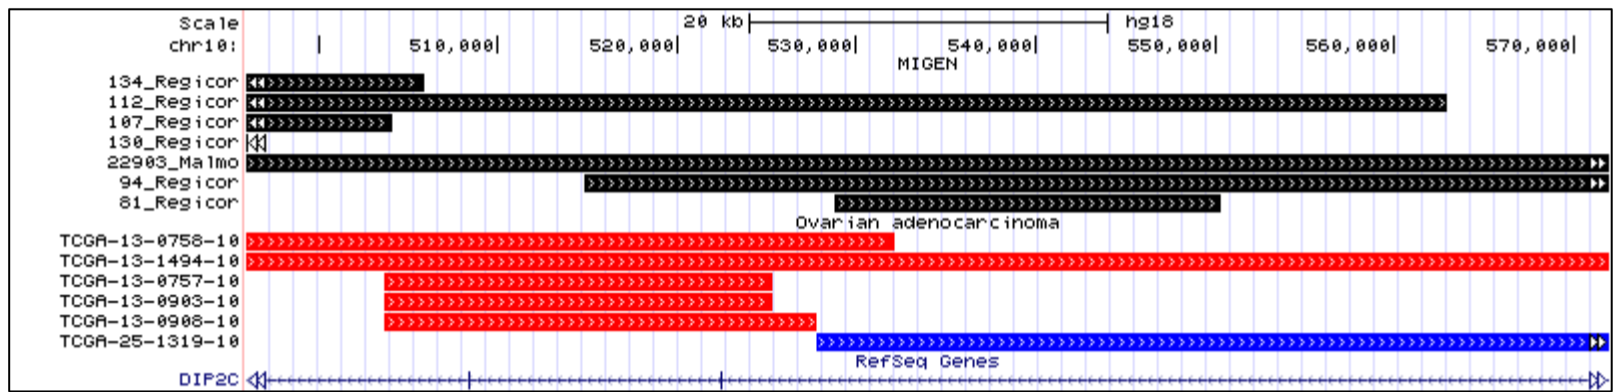

### Ovarian cancer (OV), Chr5:174076632

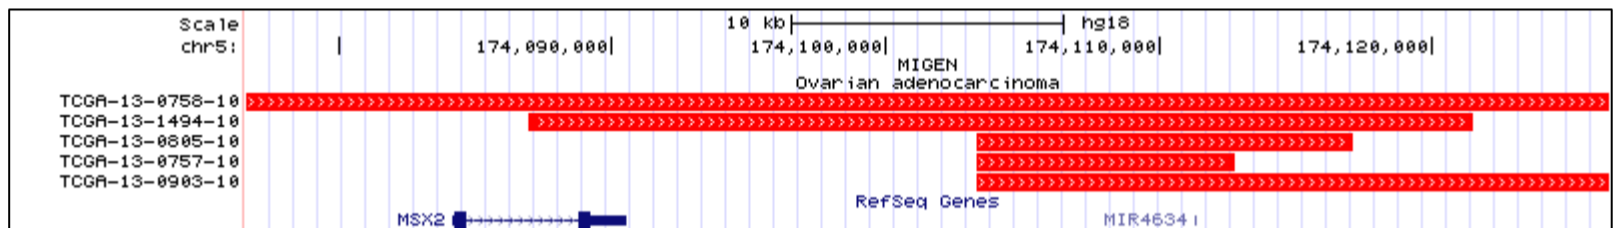

### Ovarian cancer (OV), Chr18:45329306

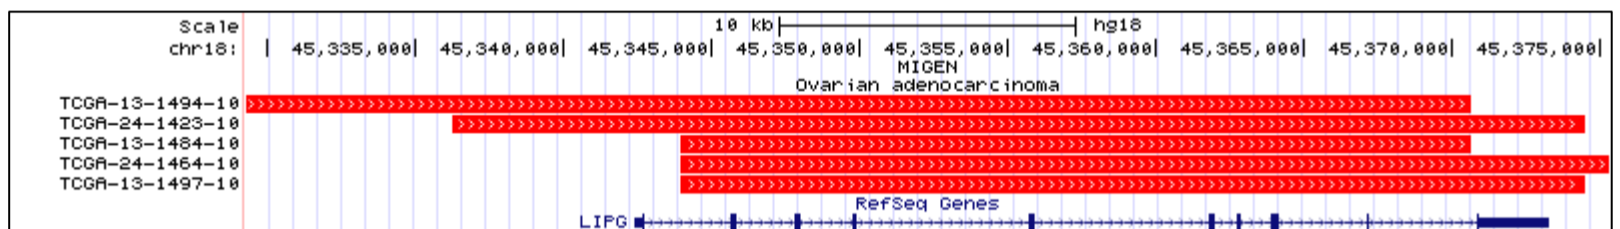

Supplement: 12943_2015_292_MOESM4_ESM.pdf [file 12943_2015_292_MOESM4_ESM.pdf]
