# Supplementary material for: Identification of rare germline copy number variations over-represented in five human cancer types
Source: PubMed Central journal article supplement (PMC4381456; doi:10.1186/s12943-015-0292-6), 2015-02-03

BRCA

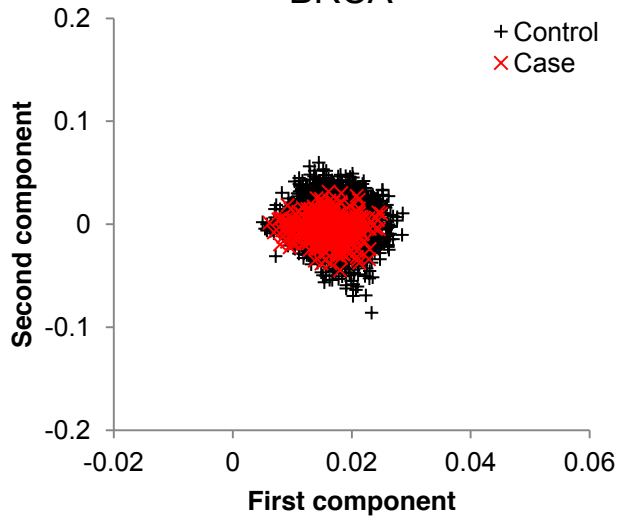

COAD

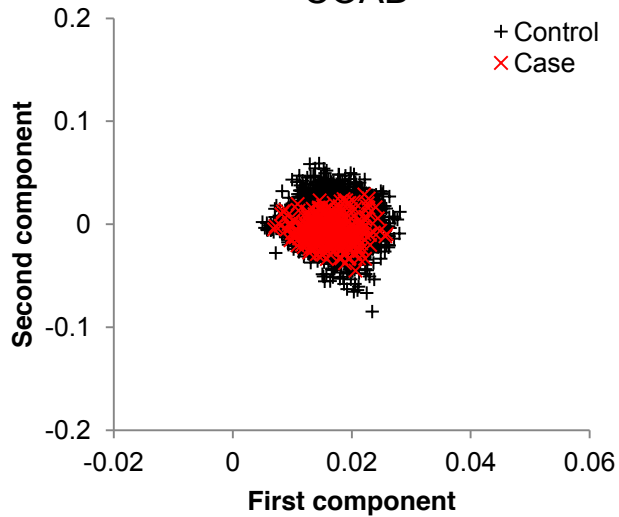

GBM

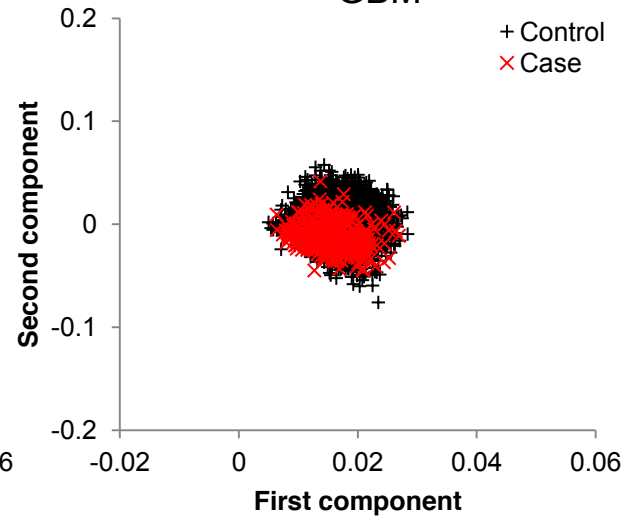

KIRC

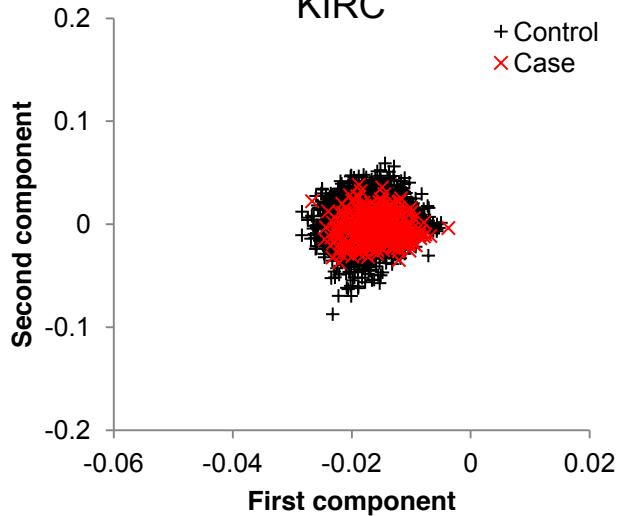

OV

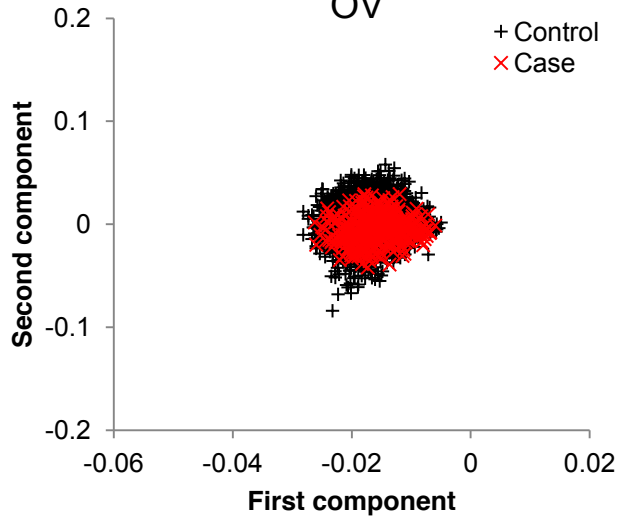

Supplement: 12943_2015_292_MOESM3_ESM.pdf [file 12943_2015_292_MOESM3_ESM.pdf]
